# CeTF: an R package to Coexpression for Transcription Factors using Regulatory Impact Factors (RIF) and Partial Correlation and Information (PCIT) analysis

Carlos Alberto Oliveira de Biagi Jr<sup>1,2\*</sup>, Ricardo Perecin Nociti<sup>2,4</sup>, Breno Osvaldo Funicheli<sup>2</sup>, Patrícia de Cássia Ruy<sup>2,5</sup>, João Paulo Bianchi Ximenez<sup>2</sup>, Wilson Araújo Silva Jr<sup>1,2,3,\*</sup>

<sup>1</sup>Department of Genetics at Ribeirão Preto Medical School, University of São Paulo, Ribeirão Preto, Brazil;

<sup>2</sup>Center for Cell-Based Therapy (CEPID/FAPESP); National Institute of Science and Technology in Stem Cell and Cell Therapy (INCTC/CNPq), Regional Blood Center of Ribeirão Preto, Ribeirão Preto, Brazil;

<sup>3</sup>Center for Integrative Systems Biology (CISBi) – NAP/USP, Ribeirão Preto, Brazil;

<sup>4</sup>Laboratory of Molecular Morphophysiology and Development, Department of Veterinary Medicine, Faculty of Animal Science and Food Engineering, University of São Paulo, Pirassununga, Brazil;

<sup>5</sup>Center for Medical Genomics, HCFMRP/USP, Ribeirão Preto, Brazil

## Abstract

**Summary:** Finding meaningful gene-gene associations and the main Transcription Factors (TFs) in co-expression networks is one of the most important challenges in gene expression data mining. CeTF is an R package that integrates the Partial Correlation with Information Theory (PCIT) and Regulatory Impact Factors (RIF) algorithms applied to gene expression data from microarray, RNA-seq, or single-cell RNA-seq platforms. This approach allows identifying the transcription factors most likely to regulate a given network in different biological systems — for example, regulation of gene pathways in tumor stromal cells and tumor cells of the same tumor. This pipeline can be easily integrated into the high-throughput analysis.

**Availability:** CeTF is available as R package in Bioconductor (<https://bioconductor.org/packages/CeTF>), GitHub (<https://github.com/cbiagii/CeTF>) and as docker image (<https://hub.docker.com/r/biagii/ctf>). More information on how to use the package can be found in the Supplemental File 1.

## Corresponding authors:

Wilson A Silva Jr ([wilsonjr@usp.br](mailto:wilsonjr@usp.br)) and Carlos AO Biagi Jr ([biagi@usp.br](mailto:biagi@usp.br))

Department of Genetics at the Ribeirão Preto Medical School, University of São Paulo  
Av. Bandeirantes 3900  
Monte Alegre  
CEP: 14049-900, Ribeirão Preto, SP, Brazil.  
Phone: +55 16-3315-3293

## 1. Introduction

Gene expression data analysis has become crucial to biological sciences, one of the most interesting forms of analyzing this type of data is the gene-to-gene network interaction analysis, aiming to highlight which gene interactions are the most relevant to the study. Despite the plethora of tools, new methods are needed to evaluate all possible interactions and their significance (Yu et al., 2013). In addition to identifying pairwise gene-to-gene interaction, finding the transcription factors (TFs) is of great interest, mainly because they can play an essential regulatory role (Farnham, 2009). Furthermore, integrating network generation with the identification of main TFs brings a deciding view of the data. In this article, we provide an R package that enables the performing of the Regulatory Impact Factors (RIF) and Partial Correlation with Information Theory (PCIT) analysis separately, or by applying the full pipeline. This package will be useful for creating a network from gene expression data identifying the most significant pairwise interactions and main TFs.

## 2. Implementation and main functions

CeTF is an implementation in R for PCIT (Reverter and Chan, 2008) and RIF (Reverter et al., 2010) algorithms, which initially were made in FORTRAN language. From these two algorithms, it was possible to integrate them in order to increase performance and results. Input data may come from microarray, RNA-seq, or single-cell RNA-seq. As seen earlier, the input data can be read counts or expression (TPM, FPKM, normalized values, and others). The main pipeline (Fig. 1) consists of the following steps.

### *Step 1: Data adjustment*

If the input data is a count table, data will be converted to TPM by each column (x) as follows:

$$TPM = \frac{10^6 * x}{sum(x)} \quad (1)$$

The mean for TPM values different than zero, and the mean values for each gene are used as a threshold to filter the genes. Genes with values above half of the previous averages will be considered for subsequent analyses. Then, the TPM data is normalized using:

$$Norm = \frac{\log(x+1)}{\log(2)} \quad (2)$$

73 If the input already has normalized expression data (TPM, FPKM, etc), the only step will be the same  
74 filter for genes that consider half of the means.

75

#### 76 *Step 2: Differential Expression analysis*

77

78 For differential analysis of gene expression, there are two options, the *Reverter* method (Reverter *et*  
79 *al.*, 2006) and DESeq2 (Love *et al.*, 2014). In both methods, two conditions are required (i.e., control  
80 vs. tumor samples). In the *Reverter* method, the mean between samples of each condition for each  
81 gene is calculated. Then, subtraction is made between the mean of one condition concerning the other  
82 conditions. The variance of the subtraction is performed, then is calculated the difference of  
83 expression using the following formula, where *s* is the result of subtraction and *var* is the variance:

84

$$85 \quad diff = \frac{s - \frac{sum(s)}{length(s)}}{\sqrt{var}} \quad (3)$$

86 The DESeq2 method applies the differential expression analysis based on the negative binomial  
87 distribution. Although both methods can be used on count data, it is strongly recommended to use  
88 only the *Reverter* method on expression input data.

89

90

#### 91 *Step 3: Regulatory Impact Factors (RIF) analysis*

92

93 The RIF algorithm is well described in the original paper (Reverter *et al.*, 2010). This step aims to  
94 identify critical Transcription Factors calculating for each condition the co-expression correlation  
95 between the TFs and the Differentially Expressed (DE) genes (from Step 2). The result is RIF1 and  
96 RIF2 metrics that allow the identification of critical TFs. The RIF1 metric classifies the TFs as most  
97 differentially co-expressed with the highly abundant and highly DE genes, and the RIF2 metric  
98 classifies the TF with the most altered ability to act as predictors of the abundance of DE genes. A  
99 main TF is defined if:

100

$$101 \quad \sqrt{RIF1^2} \text{ or } \sqrt{RIF2^2} > 1.96 \quad (4)$$

102

103

#### 104 *Step 4: Partial Correlation and Information Theory (PCIT) analysis*

105

106 The PCIT algorithm is also well described in the original paper from Reverter and Chan (Reverter  
107 and Chan, 2008). Moreover, it has been used for the reconstruction of Gene Co-expression

108 Networks (GCN). The GCN combines the concept of Partial Correlation coefficient with  
109 Information Theory to identify significant gene-to-gene associations defining edges in the  
110 reconstruction of the network. At this stage, the paired correlation of three genes is performed at the  
111 same time, thus making the inference of co-expressed genes. This approach is more sensitive than  
112 other methods and allows the detection of functionally validated gene-gene interactions. First, is  
113 calculated for every trio of genes  $x$ ,  $y$ , and  $z$  the partial correlation coefficients:

$$114 \quad 115 \quad r_{xy,z} = \frac{r_{xy} - r_{xz}r_{yz}}{\sqrt{(1-r_{xz}^2)(1-r_{yz}^2)}} \quad (5)$$

116  
117 And similarly, for  $r_{xz,y}$  and  $r_{yz,x}$ . After that, for each trio of genes is calculated the tolerance level ( $\varepsilon$ )  
118 to be used as a threshold for capturing significant associations. The average ratio of partial to direct  
119 correlation is computed as follows:

$$120 \quad 121 \quad \varepsilon = \frac{1}{3} \left( \frac{r_{xy,z}}{r_{xy}} + \frac{r_{xz,y}}{r_{xz}} + \frac{r_{yz,x}}{r_{yz}} \right) \quad (6)$$

122  
123 The association between the genes  $x$  and  $y$  is discarded if:

$$124 \quad 125 \quad |r_{xz}| \leq |\varepsilon r_{xz}| \text{ and } |r_{xy}| \leq |\varepsilon r_{yz}| \quad (7)$$

126  
127 Otherwise, the association is defined as significant, and the interaction between the genes  $x$  and  $y$  is  
128 used in the reconstruction of the GCN.

129  
130 The final output includes the network with gene-gene and gene-TF interactions for both conditions,  
131 besides generating the main TFs identified in the network.

132

133

### 134 **3. Additional functionalities**

135

136 The CeTF package also has some additional features that includes plots to visualize the data  
137 distribution, the distribution of differentially expressed genes/TFs that shows the average expression  
138 (in log2) by the difference of expression, and the network for both conditions. It is also possible to  
139 perform the grouping of ontologies (Carbon *et al.*, 2019) without statistical inference and functional

140 enrichment for several databases with statistical inference of any organism. Finally, the network that  
141 integrates the genes, TFs and pathways is generated.

142

143

### 144 **3. Conclusions**

145

146 CeTF is a tool that assists the identification of meaningful gene-gene associations and the main TFs  
147 in co-expression networks. It offers functions for a complete and customizable workflow from count  
148 or expression data to networks and visualizations in the form of a freely available R package. We  
149 expect that CeTF will be widely used by the genomics and transcriptomics community and scientists  
150 that work with high-throughput data that aims to understand how main TFs are working in a co-  
151 expression network and what are the pathways involved in this context.

152

153

### 154 **Funding**

155 This work was financed by the Coordination for the Improvement of Higher Education Personnel  
156 (CAPES), grant #88882.378695/2019-01; São Paulo Research Foundation (FAPESP), #2013/08135-  
157 2, and by Research Support of the University of Sao Paulo, CISBi-NAP/USP Grant  
158 #12.1.25441.01.2.

159

160

161 **Conflict of Interest:** none declared.

162

163 **References**

- 164 Carbon,S. *et al.* (2019) The Gene Ontology Resource: 20 years and still GOing strong. *Nucleic Acids*  
165 *Res.*, **47**, D330–D338.
- 166 Farnham,P.J. (2009) Insights from genomic profiling of transcription factors. *Nat. Rev. Genet.*, **10**,  
167 605–616.
- 168 Love,M.I. *et al.* (2014) Moderated estimation of fold change and dispersion for RNA-seq data with  
169 DESeq2. *Genome Biol.*, **15**, 1–21.
- 170 Paul Shannon,1 *et al.* (1971) Cytoscape: A Software Environment for Integrated Models. *Genome*  
171 *Res.*, **13**, 426.
- 172 Reverter,A. *et al.* (2010) Regulatory impact factors: Unraveling the transcriptional regulation of  
173 complex traits from expression data. *Bioinformatics*, **26**, 896–904.
- 174 Reverter,A. *et al.* (2006) Simultaneous identification of differential gene expression and connectivity  
175 in inflammation, adipogenesis and cancer. *Bioinformatics*, **22**, 2396–2404.
- 176 Reverter,A. and Chan,E.K.F. (2008) Combining partial correlation and an information theory  
177 approach to the reversed engineering of gene co-expression networks. *Bioinformatics*, **24**, 2491–  
178 2497.
- 179 Weinstein,J.N. *et al.* (2013) The cancer genome atlas pan-cancer analysis project. *Nat. Genet.*, **45**,  
180 1113–1120.
- 181 Yu,D. *et al.* (2013) Review of Biological Network Data and Its Applications. *Genomics Inform.*, **11**,  
182 200.
- 183

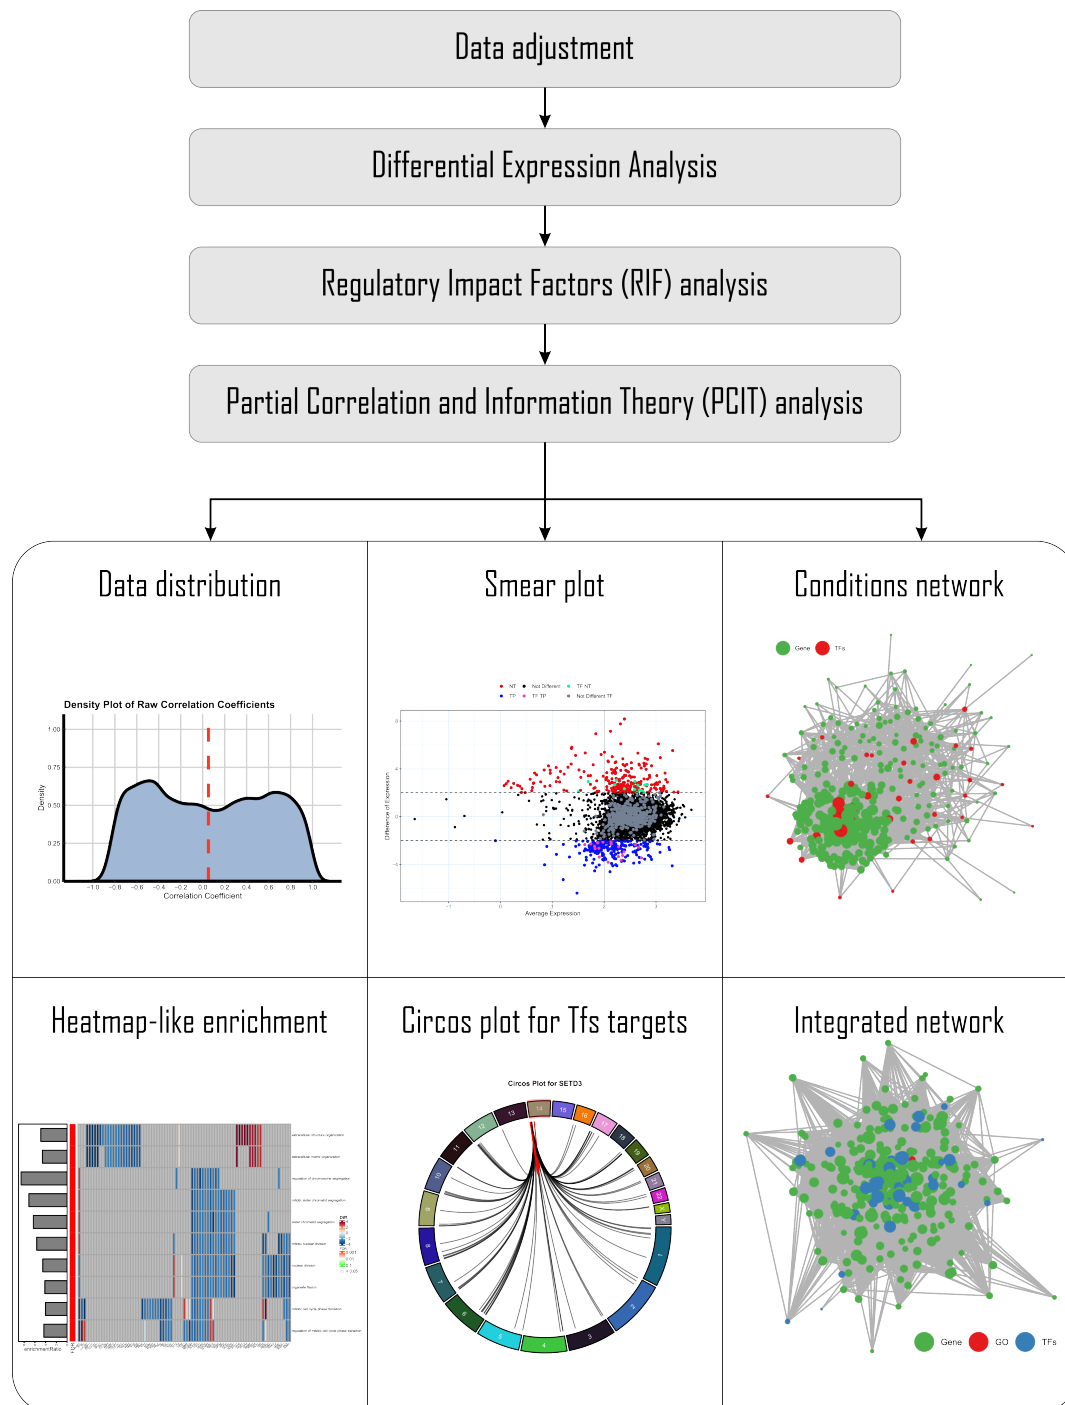

184

185 **Fig. 1:** Schematic of a CeTF workflow. The main functions of CeTF and their logical order are  
186 illustrated. Grey boxes signify the mandatory steps for the main analysis. The white box signifies the  
187 optional outputs from CeTF package, i.e. data distribution, smear plot, conditions network, heatmap-  
188 like enrichment, circos plot for TFs targets, integrated network, etc.
